# Supplementary material for: ABCMdb reloaded: updates on mutations in ATP binding cassette proteins
Source: Oxford University Press journal article supplement (doi:10.1093/database/bax023), 2017-01-01
Supplement: bax023_Supp.pdf [file bax023_Supp.pdf]

**ABCmdb reloaded: updates on mutations in ATP Binding Cassette proteins**

Hedvig Tordai, Kristóf Jakab, Gergely Gyimesi, Kinga András, Anna Brózik,

Balázs Sarkadi, Tamás Hegedűs

**Supporting Information**

**Table S1. Variations queried from ClinVar.** Genetic alterations were filtered and categorized as missense, nonsense, and synonymous mutations. Genes were ordered by the number of variations. D: deleterious, N: neutral, ?: unspecified.

| gene          | all | coding | unique     | synonymous<br>total | missense |    |     |            | nonsense |   |    |            |
|---------------|-----|--------|------------|---------------------|----------|----|-----|------------|----------|---|----|------------|
|               |     |        |            |                     | D        | N  | ?   | total      | D        | N | ?  | total      |
| <b>CFTR</b>   | 901 | 747    | <b>731</b> | <b>38</b>           | 100      | 10 | 440 | <b>550</b> | 52       | 0 | 91 | <b>143</b> |
| ABCA4         | 476 | 372    | <b>370</b> | <b>52</b>           | 28       | 10 | 234 | <b>272</b> | 7        | 0 | 39 | <b>46</b>  |
| ABCC9         | 115 | 91     | <b>91</b>  | <b>33</b>           | 14       | 2  | 38  | <b>54</b>  | 1        | 1 | 2  | <b>4</b>   |
| ABCC8         | 66  | 49     | <b>49</b>  | <b>16</b>           | 24       | 3  | 2   | <b>29</b>  | 4        | 0 | 0  | <b>4</b>   |
| ABCD1         | 50  | 43     | <b>43</b>  | <b>4</b>            | 28       | 0  | 5   | <b>33</b>  | 6        | 0 | 0  | <b>6</b>   |
| ABCA3         | 27  | 26     | <b>26</b>  | <b>7</b>            | 6        | 1  | 11  | <b>18</b>  | 1        | 0 | 0  | <b>1</b>   |
| ABCC2         | 25  | 20     | <b>20</b>  | <b>5</b>            | 4        | 6  | 3   | <b>13</b>  | 2        | 0 | 0  | <b>2</b>   |
| <b>ABCC6</b>  | 23  | 21     | <b>21</b>  | <b>1</b>            | 13       | 3  | 1   | <b>17</b>  | 3        | 0 | 0  | <b>3</b>   |
| ABCB4         | 21  | 19     | <b>19</b>  | <b>2</b>            | 6        | 2  | 7   | <b>15</b>  | 2        | 0 | 0  | <b>2</b>   |
| ABCC1         | 21  | 5      | <b>5</b>   | <b>2</b>            | 0        | 0  | 3   | <b>3</b>   | 0        | 0 | 0  | <b>0</b>   |
| ABCA1         | 15  | 14     | <b>14</b>  | <b>0</b>            | 12       | 0  | 1   | <b>13</b>  | 1        | 0 | 0  | <b>1</b>   |
| <b>ABCB11</b> | 15  | 14     | <b>14</b>  | <b>4</b>            | 2        | 3  | 3   | <b>8</b>   | 2        | 0 | 0  | <b>2</b>   |
| ABCG8         | 13  | 12     | <b>12</b>  | <b>1</b>            | 3        | 1  | 3   | <b>7</b>   | 4        | 0 | 0  | <b>4</b>   |
| ABCB7         | 11  | 9      | <b>9</b>   | <b>2</b>            | 5        | 2  | 0   | <b>7</b>   | 0        | 0 | 0  | <b>0</b>   |
| ABCG5         | 10  | 9      | <b>9</b>   | <b>1</b>            | 2        | 0  | 2   | <b>4</b>   | 4        | 0 | 0  | <b>4</b>   |
| ABCB6         | 9   | 9      | <b>9</b>   | <b>0</b>            | 6        | 0  | 2   | <b>8</b>   | 1        | 0 | 0  | <b>1</b>   |
| ABCA12        | 8   | 8      | <b>8</b>   | <b>0</b>            | 7        | 0  | 0   | <b>7</b>   | 1        | 0 | 0  | <b>1</b>   |
| ABCB1         | 5   | 5      | <b>5</b>   | <b>1</b>            | 1        | 3  | 0   | <b>4</b>   | 0        | 0 | 0  | <b>0</b>   |
| ABCG2         | 5   | 5      | <b>5</b>   | <b>0</b>            | 0        | 0  | 2   | <b>2</b>   | 1        | 0 | 2  | <b>3</b>   |
| TAP1          | 3   | 3      | <b>3</b>   | <b>0</b>            | 1        | 2  | 0   | <b>3</b>   | 0        | 0 | 0  | <b>0</b>   |
| TAP2          | 3   | 3      | <b>3</b>   | <b>0</b>            | 0        | 2  | 0   | <b>2</b>   | 0        | 1 | 0  | <b>1</b>   |
| ABCC4         | 1   | 1      | <b>1</b>   | <b>0</b>            | 0        | 0  | 1   | <b>1</b>   | 0        | 0 | 0  | <b>0</b>   |
| ABCC5         | 1   | 1      | <b>1</b>   | <b>0</b>            | 0        | 0  | 1   | <b>1</b>   | 0        | 0 | 0  | <b>0</b>   |
| ABCD3         | 1   | 1      | <b>1</b>   | <b>0</b>            | 0        | 0  | 1   | <b>1</b>   | 0        | 0 | 0  | <b>0</b>   |
| ABCD4         | 1   | 1      | <b>1</b>   | <b>0</b>            | 1        | 0  | 0   | <b>1</b>   | 0        | 0 | 0  | <b>0</b>   |
| ABCG4         | 1   | 1      | <b>1</b>   | <b>0</b>            | 0        | 0  | 1   | <b>1</b>   | 0        | 0 | 0  | <b>0</b>   |
| ABCA5         | 1   | 0      | <b>0</b>   | <b>0</b>            | 0        | 0  | 0   | <b>0</b>   | 0        | 0 | 0  | <b>0</b>   |
| ABCA10        | 0   | 0      | <b>0</b>   | <b>0</b>            | 0        | 0  | 0   | <b>0</b>   | 0        | 0 | 0  | <b>0</b>   |
| ABCA13        | 0   | 0      | <b>0</b>   | <b>0</b>            | 0        | 0  | 0   | <b>0</b>   | 0        | 0 | 0  | <b>0</b>   |
| ABCA2         | 0   | 0      | <b>0</b>   | <b>0</b>            | 0        | 0  | 0   | <b>0</b>   | 0        | 0 | 0  | <b>0</b>   |
| ABCA6         | 0   | 0      | <b>0</b>   | <b>0</b>            | 0        | 0  | 0   | <b>0</b>   | 0        | 0 | 0  | <b>0</b>   |
| ABCA7         | 0   | 0      | <b>0</b>   | <b>0</b>            | 0        | 0  | 0   | <b>0</b>   | 0        | 0 | 0  | <b>0</b>   |
| ABCA8         | 0   | 0      | <b>0</b>   | <b>0</b>            | 0        | 0  | 0   | <b>0</b>   | 0        | 0 | 0  | <b>0</b>   |
| ABCA9         | 0   | 0      | <b>0</b>   | <b>0</b>            | 0        | 0  | 0   | <b>0</b>   | 0        | 0 | 0  | <b>0</b>   |
| ABCB10        | 0   | 0      | <b>0</b>   | <b>0</b>            | 0        | 0  | 0   | <b>0</b>   | 0        | 0 | 0  | <b>0</b>   |
| ABCB5         | 0   | 0      | <b>0</b>   | <b>0</b>            | 0        | 0  | 0   | <b>0</b>   | 0        | 0 | 0  | <b>0</b>   |
| ABCB8         | 0   | 0      | <b>0</b>   | <b>0</b>            | 0        | 0  | 0   | <b>0</b>   | 0        | 0 | 0  | <b>0</b>   |
| ABCB9         | 0   | 0      | <b>0</b>   | <b>0</b>            | 0        | 0  | 0   | <b>0</b>   | 0        | 0 | 0  | <b>0</b>   |
| ABCC10        | 0   | 0      | <b>0</b>   | <b>0</b>            | 0        | 0  | 0   | <b>0</b>   | 0        | 0 | 0  | <b>0</b>   |
| ABCC11        | 0   | 0      | <b>0</b>   | <b>0</b>            | 0        | 0  | 0   | <b>0</b>   | 0        | 0 | 0  | <b>0</b>   |
| ABCC12        | 0   | 0      | <b>0</b>   | <b>0</b>            | 0        | 0  | 0   | <b>0</b>   | 0        | 0 | 0  | <b>0</b>   |
| ABCC3         | 0   | 0      | <b>0</b>   | <b>0</b>            | 0        | 0  | 0   | <b>0</b>   | 0        | 0 | 0  | <b>0</b>   |
| ABCD2         | 0   | 0      | <b>0</b>   | <b>0</b>            | 0        | 0  | 0   | <b>0</b>   | 0        | 0 | 0  | <b>0</b>   |
| ABCG1         | 0   | 0      | <b>0</b>   | <b>0</b>            | 0        | 0  | 0   | <b>0</b>   | 0        | 0 | 0  | <b>0</b>   |

**Table S2. Performance of SNAP2 and PROVEAN does not increase largely and consequently for the conserved nucleotide binding domains as compared to curated mutations from databases.**

**NBD:**

| gene        | effect      | curated | SNAP2     | PROVEAN  |
|-------------|-------------|---------|-----------|----------|
| ABCB11/BSEP | deleterious | 75      | 52 (69%)* | 54 (72%) |
|             | neutral     | 18      | 7 (39%)   | 6 (33%)  |
|             | unspecified | 5       |           |          |
| ABCC6/MRP6  | deleterious | 79      | 55 (70%)  | 56 (71%) |
|             | neutral     | 0       |           |          |
|             | unspecified | 0       |           |          |
| ABCC7/CFTR  | deleterious | 121     | 63 (52%)  | 70 (58%) |
|             | neutral     | 14      | 4 (29%)   | 6 (43%)  |
|             | unspecified | 213     |           |          |

**TMD:**

| gene        | effect      | curated | SNAP2    | PROVEAN  |
|-------------|-------------|---------|----------|----------|
| ABCB11/BSEP | deleterious | 57      | 37 (65%) | 36 (63%) |
|             | neutral     | 26      | 17 (65%) | 10 (38%) |
|             | unspecified | 8       |          |          |
| ABCC6/MRP6  | deleterious | 71      | 50 (70%) | 49 (69%) |
|             | neutral     | 1       | 0 (0%)   | 0 (0%)   |
|             | unspecified | 0       |          |          |
| ABCC7/CFTR  | deleterious | 151     | 91 (60%) | 68 (45%) |
|             | neutral     | 7       | 1 (14%)  | 4 (57%)  |
|             | unspecified | 279     |          |          |

\* The number of correctly predicted mutation effects (true positive hits)

**Table S3. Significant portion of conservative and non-conservative amino acid replacements can lead to deleterious and neutral changes, respectively.** Variants with premature stop and silent amino acid changes were not counted.

| <b>a.a. change:</b> | <b>conservative</b> |                | <b>non-conservative</b> |                |
|---------------------|---------------------|----------------|-------------------------|----------------|
|                     | <b>deleterious</b>  | <b>neutral</b> | <b>deleterious</b>      | <b>neutral</b> |
| ABCB11/BSEP         | 51% (25/49)         | 49% (24/49)    | 80% (105/131)           | 20% (26/131)   |
| ABCC6/MRP6          | 100% (39/39)        | 0% (0/39)      | 98% (117/120)           | 3% (3/120)     |
| ABCC7/CFTR          | 87% (48/55)         | 13% (7/55)     | 94% (206/218)           | 6% (12/218)    |

**Figure S1. The major changes in the web interface associated with novel data, such as predicted effect of mutations by SNAP2 and PROVEAN, effect of mutations collected from databases (top panel), and mutations in non-coding regions (bottom panel).**

**ABCMdb: Database for Mutations in ABC proteins**

Home Browse Search Statistics About Usage Contact Login

### Mutations in ABCG2

reference sequence

| Region | Mutation                                         | Publications | Sentences | MutMiner_hits | SNAP2 | PROVEAN | Effect_dbs |
|--------|--------------------------------------------------|--------------|-----------|---------------|-------|---------|------------|
| CL0    | p.Ser <b>2</b> Ala details homologous mutations  | 1            | 1         | 1             | N     | N       | ?          |
| CL0    | p.Val <b>12</b> Met details homologous mutations | 146          | 660       | 725           | N     | N       | ?          |
| CL0    | p.Val <b>12</b> Asn details homologous mutations | 2            | 4         | 4             | D     | N       | ?          |
| CL0    | p.Ser <b>13</b> Leu details homologous mutations | 1            | 6         | 7             | D     | N       | ?          |
| CL0    | p.Gly <b>15</b> Trp details homologous mutations | 2            | 2         | 2             | D     | N       | ?          |
| CL0    | p.Thr <b>17</b> Asn details homologous mutations | 1            | 1         | 1             | N     | N       | ?          |
| CL0    | p.Ala <b>24</b> Val details homologous mutations | 5            | 5         | 5             | N     | N       | ?          |
| CL0    | p.Ser <b>25</b> Pro details homologous mutations | 1            | 1         | 1             | N     | N       | ?          |
| CL0    | p.Ser <b>25</b> Arg details homologous mutations | 1            | 1         | 1             | N     | N       | ?          |
| CL0    | p.Phe <b>31</b> Ser details homologous mutations | 1            | 1         | 1             | N     | N       | ?          |
| CL0    | p.Phe <b>31</b> Trp details homologous mutations | 2            | 2         | 2             | N     | N       | ?          |
| CL0    | p.Gly <b>34</b> Ala details homologous mutations | 71           | 298       | 323           | N     | D       | ?          |

Home Browse Search Statistics About Usage Contact Login

### Browse

**ABCA** [show]

**ABCB** [hide]

|        |                        |          |                       |                                              |
|--------|------------------------|----------|-----------------------|----------------------------------------------|
| ABCB1  | [mined mutations (mm)] | [map mm] | [m in coding regions] | [TF binding sites]                           |
| ABCB2  | [mined mutations (mm)] | [map mm] | [m in coding regions] |                                              |
| ABCB3  | [mined mutations (mm)] | [map mm] | [m in coding regions] |                                              |
| ABCB4  | [mined mutations (mm)] | [map mm] | [m in coding regions] | [m in non-coding regions]                    |
| ABCB5  | [mined mutations (mm)] | [map mm] |                       |                                              |
| ABCB6  | [mined mutations (mm)] | [map mm] | [m in coding regions] |                                              |
| ABCB7  | [mined mutations (mm)] | [map mm] | [m in coding regions] | [m in non-coding regions]                    |
| ABCB8  |                        |          |                       |                                              |
| ABCB9  | [mined mutations (mm)] | [map mm] |                       |                                              |
| ABCB10 | [mined mutations (mm)] | [map mm] |                       |                                              |
| ABCB11 | [mined mutations (mm)] | [map mm] | [m in coding regions] | [m in non-coding regions] [TF binding sites] |

**ABCC** [show]

**ABCD** [show]

**ABCG** [hide]

|       |                        |          |                       |                           |
|-------|------------------------|----------|-----------------------|---------------------------|
| ABCG1 | [mined mutations (mm)] | [map mm] |                       |                           |
| ABCG2 | [mined mutations (mm)] | [map mm] | [m in coding regions] | [TF binding sites]        |
| ABCG4 |                        |          | [m in coding regions] |                           |
| ABCG5 | [mined mutations (mm)] | [map mm] | [m in coding regions] | [m in non-coding regions] |
| ABCG8 | [mined mutations (mm)] | [map mm] | [m in coding regions] | [m in non-coding regions] |

**Figure S2. Mutations identified in an automatic way in full text papers are connected to entries in other data sources such as ClinVar and LSDBs and to *in silico* predictions by SNAP2 and PROVEAN to deliver as much information on phenotype as possible.**


ABCmdb: Database  
for Mutations in ABC proteins

[Home](#) [Browse](#) [Search](#) [Statistics](#) [About](#) [Usage](#) [Contact](#) [Login](#)

### ABCC6 p.Arg518Gln

**ClinVar:** [c.1552C>T , p.Arg518Ter D](#) , Pathogenic

**LOVD-ABCC6:** [p.Arg518Gln D](#)  
[p.Arg518\\* D](#)

**Predicted by SNAP2:** A: **D** (95%), C: **D** (95%), D: **D** (95%), E: **D** (95%), F: **D** (95%), G: **D** (95%), H: **D** (95%), I: **D** (95%), K: **D** (95%), L: **D** (95%), M: **D** (95%),  
**Predicted by PROVEAN:** A: **D**, C: **D**, D: **D**, E: **D**, F: **D**, G: **D**, H: **D**, I: **D**, K: **D**, L: **D**, M: **D**, N: **D**, P: **D**, Q: **D**, S: **D**, T: **D**, V: **D**, W: **D**, Y: **D**,

[\[switch to compact view\]](#)

**Comments** [\[show\]](#)

**Publications**

---

[\[hide\]](#) [Uitto J, Pulkkinen L, Ringpfeil F](#)  
**Molecular genetics of pseudoxanthoma elasticum: a metabolic disorder at the environment-genome interface?**  
Trends Mol Med. 2001 Jan;7(1):13-7., [\[PMID:11427982\]](#) [\[PubMed\]](#)

[Abstract](#) [\[show\]](#)  
[Comments](#) [\[show\]](#)  
[Sentences](#) [\[show\]](#)

---

[\[hide\]](#) [Le Saux O, Beck K, Sachsinger C, Silvestri C, Treiber C, Goring HH, Johnson EW, De Paepe A, Pope FM, Pasquali-Ronchetti I, Bercovitch L, Marais AS, Viljoen DL, Terry SF, Boyd CD](#)  
**A spectrum of ABCC6 mutations is responsible for pseudoxanthoma elasticum.**  
Am J Hum Genet. 2001 Oct;69(4):749-64. Epub 2001 Aug 31., [\[PMID:11536079\]](#) [\[PubMed\]](#)

**Figure S3. Querying variations at the DNA level and batch queries are also novel additional changes in the web interface.**

**ABCMdb: Database for Mutations in ABC proteins**

Home Browse Search Statistics About Usage Contact Login

### Search

This function can be used to search for mutations that are in homologous positions to a certain amino acid in an ABC protein.

Select a protein:

Amino acid position:  (valid range: 1 to 1280)

cDNA location:  (valid range: 1 to 3840)

Chromosome location:  (valid range: 87503863 to 87713323)

You can paste protein, cDNA, a genomic positions here, such as p.234, c.3456, g.16851502.  
! If you do not select a protein, references to protein and cDNA positions will be ingored !  
Here you can include also complex cDNA reference, such as c.3883-24G>A.

List of positions:

**Examples for ABCC6:**  
g.16177623  
g.16157810  
g.16154767  
g.16182799  
p.Gly226Arg  
p.Glu1400Lys  
c.3634-3C>A  
c.\*38G>A  
c.220-1G>C  
16182799
